# Supplementary material for: Characterization of Retinal Drusen in Subjects at High Genetic Risk of Developing Sporadic Alzheimer’s Disease: An Exploratory Analysis
Source: MDPI journal article supplement (doi:10.3390/jpm12050847), 2022-05-23
Supplement: s1 [file s1]

**Table S1.** P- value of drusen number and size groups characterized by history family and ApoE ε4 genotype. Mann Whitney U test.

|                                                |              | Drusen size  |              |              |              |
|------------------------------------------------|--------------|--------------|--------------|--------------|--------------|
|                                                |              | FH- ApoE ε4- | FH- ApoE ε4+ | FH+ ApoE ε4- | FH+ ApoE ε4+ |
| Drusen number                                  | FH- ApoE ε4- |              | 0,838        | 0,311        | 0,769        |
|                                                | FH- ApoE ε4+ | 0,645        |              | 0.774        | 0,951        |
|                                                | FH+ ApoE ε4- | 0,129        | 0,275        |              | 0,628        |
|                                                | FH+ ApoE ε4+ | 0,172        | 0,340        | 0,802        |              |
| (FH: Familiar history; ApoE: apolipoprotein E) |              |              |              |              |              |

**Table S2.** P- value of drusen number and size groups characterized by history family, ApoE ε4 genotype and diabetes mellitus. Mann Whitney U test.

|                                                                       |                     | Drusen size         |                     |                     |                     |
|-----------------------------------------------------------------------|---------------------|---------------------|---------------------|---------------------|---------------------|
|                                                                       |                     | FH- ApoE ε4-<br>DM- | FH- ApoE ε4+<br>DM- | FH+ ApoE ε4-<br>DM- | FH+ ApoE ε4+<br>DM- |
| Drusen number                                                         | FH- ApoE ε4-<br>DM- |                     | 0,811               | 0,372               | 0,843               |
|                                                                       | FH- ApoE ε4+<br>DM- | 0,540               |                     | 0,861               | 0,932               |
|                                                                       | FH+ ApoE ε4-<br>DM- | 0,220               | 0,295               |                     | 0,552               |
|                                                                       | FH+ ApoE ε4+<br>DM- | 0,222               | 0,335               | 0,904               |                     |
| (FH: Familiar history; ApoE: apolipoprotein E; DM: Diabetes Mellitus) |                     |                     |                     |                     |                     |
